# Supplementary material for: Do nutrition and cash-based interventions and policies aimed at reducing stunting have an impact on economic development of low-and-middle-income countries? A systematic review
Source: PubMed Central journal article supplement (PMC6820910; doi:10.1186/s12889-019-7677-1), 2019-10-30
Supplement: 12889_2019_7677_MOESM1_ESM.pdf [file 12889_2019_7677_MOESM1_ESM.pdf]

## Additional file 1. Supplementary table 1

**Supplementary table 1– Description of terminology for economic indicators.**

| <b>Economic indicator</b>       | <b>Specific terminology</b>                                                                                                                                                                                                                                  |
|---------------------------------|--------------------------------------------------------------------------------------------------------------------------------------------------------------------------------------------------------------------------------------------------------------|
| <b>Childhood mortality</b>      | Under 5 mortality rate (U5MR); child morbidity, child health                                                                                                                                                                                                 |
| <b>Human capital indicators</b> |                                                                                                                                                                                                                                                              |
|                                 | Cognitive health<br><i>language development; school achievement; cognitive development; motor development; socioemotional development; cognitive ability; reading comprehension; cognitive functioning; schooling-related outcomes; behavioural problems</i> |
|                                 | Economic outcomes<br><i>annual income hours worked; average hourly wages; labor market outcomes</i>                                                                                                                                                          |
|                                 | Chronic disease<br><i>adult health outcomes; cardiovascular health</i>                                                                                                                                                                                       |
