# Supplementary material for: Do nutrition and cash-based interventions and policies aimed at reducing stunting have an impact on economic development of low-and-middle-income countries? A systematic review
Source: PubMed Central journal article supplement (PMC6820910; doi:10.1186/s12889-019-7677-1), 2019-10-30
Supplement: 12889_2019_7677_MOESM3_ESM.pdf [file 12889_2019_7677_MOESM3_ESM.pdf]

### **Additional file 3. Supplementary tables 3-6**

***Supplementary table 3– WorldBank estimates for Ethiopia U5MR (2000-2017)***

| <b>Year</b>        | <b>U5MR Prevalence</b> |
|--------------------|------------------------|
| 2000               | 142.6                  |
| 2002               | 130.4                  |
| 2004               | 117.4                  |
| 2006               | 104.9                  |
| 2008               | 93.5                   |
| 2010               | 83.7                   |
| 2011               | 79.2                   |
| 2013               | 71.2                   |
| 2016               | 61.2                   |
| 2017               | 58.5                   |
| Calculated<br>AARR | 5.20%                  |

***Supplementary table 4– WorldBank estimates for Malawi U5MR (2000-2017)***

| <b>Year</b>        | <b>U5MR Prevalence</b> |
|--------------------|------------------------|
| 2000               | 171.9                  |
| 2002               | 146.4                  |
| 2004               | 122.6                  |
| 2006               | 107.7                  |
| 2008               | 97.7                   |
| 2010               | 88.6                   |
| 2012               | 75.9                   |
| 2014               | 67.5                   |
| 2016               | 61.2                   |
| 2017               | 55.4                   |
| Calculated<br>AARR | 6.20%                  |

**Supplementary table 5– WorldBank estimates for Peru U5MR (2000-2017)**

| <b>Year</b>        | <b>U5MR Prevalence</b> |
|--------------------|------------------------|
| 2000               | 38.7                   |
| 2002               | 33.1                   |
| 2004               | 28.7                   |
| 2006               | 25.2                   |
| 2008               | 22.5                   |
| 2010               | 20.3                   |
| 2012               | 18.5                   |
| 2014               | 16.9                   |
| 2016               | 15.5                   |
| 2017               | 15                     |
| Calculated<br>AARR | 5.30%                  |

**Supplementary table 6– WorldBank estimates for Niger U5MR (2000-2017)**

| <b>Year</b>        | <b>U5MR Prevalence</b> |
|--------------------|------------------------|
| 2000               | 223.7                  |
| 2002               | 203.1                  |
| 2004               | 180.4                  |
| 2006               | 158.4                  |
| 2008               | 139.6                  |
| 2010               | 123.6                  |
| 2012               | 109.9                  |
| 2014               | 98.6                   |
| 2016               | 88.7                   |
| 2017               | 84.5                   |
| Calculated<br>AARR | 5.70%                  |
