# Supplementary material for: Do nutrition and cash-based interventions and policies aimed at reducing stunting have an impact on economic development of low-and-middle-income countries? A systematic review
Source: PubMed Central journal article supplement (PMC6820910; doi:10.1186/s12889-019-7677-1), 2019-10-30

## Additional File 4. Supplementary figure 1

### Supplementary Figure 1 – Quality assessment of cohort studies

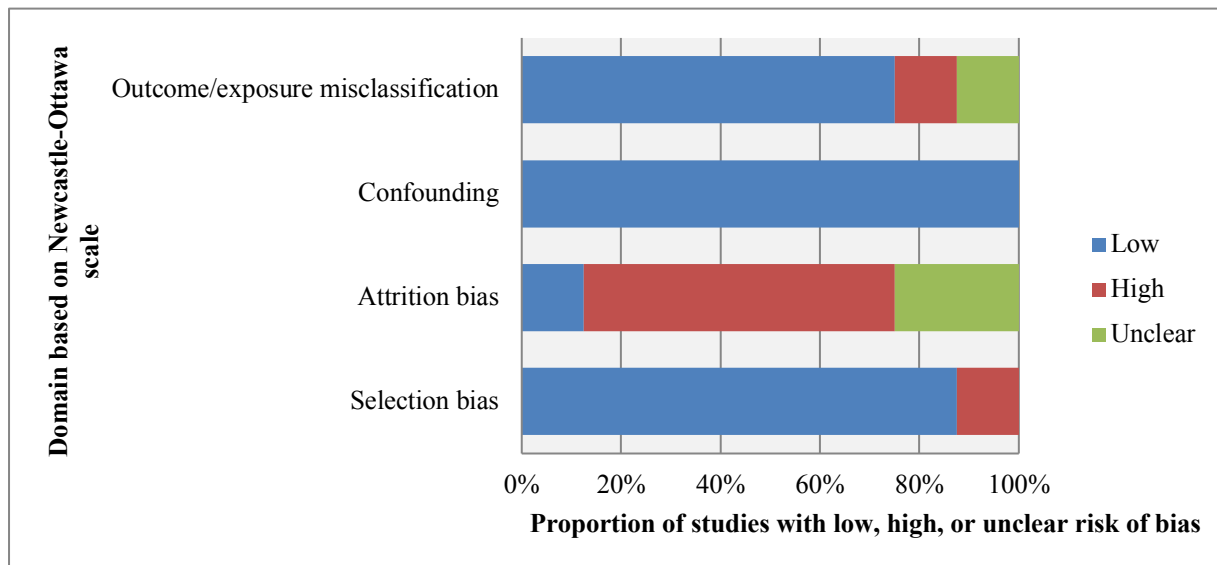

Supplement: 12889_2019_7677_MOESM4_ESM.pdf [file 12889_2019_7677_MOESM4_ESM.pdf]
