# Supplementary material for: Do nutrition and cash-based interventions and policies aimed at reducing stunting have an impact on economic development of low-and-middle-income countries? A systematic review
Source: BMC Public Health. 2019 Oct 30;19:1419. doi: 10.1186/s12889-019-7677-1 (PMC6820910; doi:10.1186/s12889-019-7677-1)
Supplement: Supplementary file 5 — Additional file 5: Figure S2 and Table S7. Quality assessment of trials. (PDF 67 kb) [file 12889_2019_7677_MOESM5_ESM.pdf]

**Additional File 5. Supplementary figure 2 and supplementary table 7**  
**Supplementary Figure 2 – Quality assessment of trials**

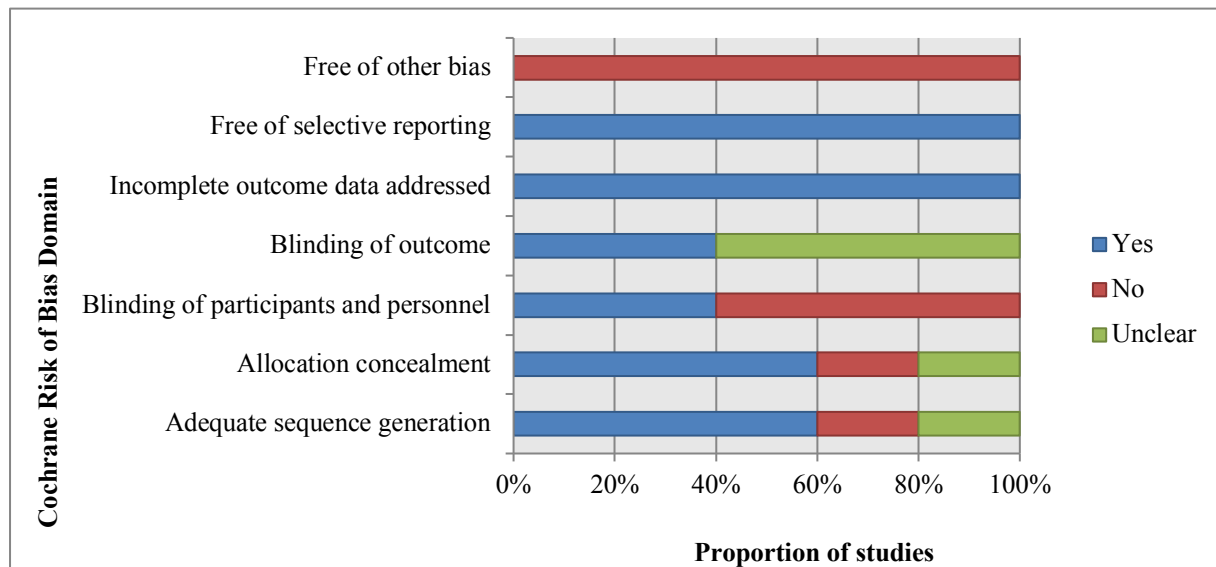

**Supplementary Table 7 – Other biases in trials**

| Type of bias                               | Frequency of appearance in trials | %           |
|--------------------------------------------|-----------------------------------|-------------|
| sampling bias                              | 2                                 | 29%         |
| selection bias                             | 1                                 | 14%         |
| Self-reported outcomes (desirability bias) | 2                                 | 29%         |
| recall bias                                | 2                                 | 29%         |
| <b>Total</b>                               | <b>7</b>                          | <b>100%</b> |
